# Supplementary material
Source: MDPI journal article supplement (https://www.mdpi.com/1996-1073/13/20/5294)
Supplement: s1 [file s1]

# **Coproduction of furfural, phenolated ligninand and fermentable sugars from bamboo with one-pot fractionation using phenol-acidic 1,4-dioxane**

Li Ji<sup>a, b</sup>, Pengfei Li<sup>b, c</sup>, Fuhou Lei<sup>c</sup>, Xianliang Song<sup>b</sup>, Jianxin Jiang<sup>a, b\*</sup>, Kun Wang<sup>b\*</sup>

<sup>a</sup>Beijing Advanced Innovation Center for Tree Breeding by Molecular Design, Beijing Forestry University, Beijing 100083, China

<sup>b</sup>Department of Chemistry and Chemical Engineering, MOE Engineering Research Center of Forestry Biomass Materials and Bioenergy, Beijing Forestry University, Beijing 100083, China

<sup>c</sup>Guangxi Key Laboratory of Chemistry and Engineering of Forest Products, College of Chemistry and Chemical Engineering, Guangxi University for Nationalities, Nanning 530006, China

\*Corresponding author

Jianxin Jiang<sup>\*</sup>, e-mail: jiangjx2004@hotmail.com

Kun Wang<sup>\*</sup>, e-mail: wangkun@bjfu.edu.cn

|                                                |   |
|------------------------------------------------|---|
| Method of Enzyme Activity Analysis.....        | 2 |
| Reaction Conditions During Fractionation ..... | 3 |
| Material Composition Analyses.....             | 4 |
| GPC Analyses.....                              | 5 |
| Enzyme Activity Analyses.....                  | 6 |

### Enzyme Activity Analyses

The release of p-nitrophenol from p-nitrophenyl- $\beta$ -D-galactopyranoside (pNPG) was monitored to determine the  $\beta$ -glucosidase activity. The enzyme solution of 0.5 mL was incubated with 1 mL pNPG ( $1 \text{ mmol}\cdot\text{L}^{-1}$ ) of sodium acetate, pH 4.8, and 1.5 mL  $\text{H}_2\text{O}$  at  $50^\circ\text{C}$  for 10 min. The 2 mL of sodium carbonate ( $1 \text{ mol}\cdot\text{L}^{-1}$ ) was added to stop the enzyme reaction, and the colour developed at 400 nm. The exo- $\beta$ -1,4-glucanase activity was assayed using p-nitrophenol-D-cellobioside (pNPC) as substrate to determine its ability to hydrolyze cellobiose. The enzyme solution (0.5 mL) was incubated with 4.5 mL pNPC ( $1 \text{ mmol}\cdot\text{L}^{-1}$ ) of sodium acetate, pH 4.8, at  $50^\circ\text{C}$  for 30 min. The 5 mL of sodium carbonate ( $1 \text{ mol}\cdot\text{L}^{-1}$ ) was added to stop the enzyme reaction, and the colour developed at 400 nm.

**Table S1.** The specific reaction condition during fractionation process.

| Without phenol addition |                                 |      |        |                 | With phenol addition    |      |        |                                 |                 |
|-------------------------|---------------------------------|------|--------|-----------------|-------------------------|------|--------|---------------------------------|-----------------|
| Entry                   | 1,4-dioxane solvent addition/mL | T/°C | Time/h | Severity factor | Phenol addition (% w/v) | T/°C | Time/h | 1,4-dioxane solvent addition/mL | Severity factor |
| 1                       | 900                             | 80   | 5      | 1.89            | 1.0                     | 80   | 2      | 900                             | 1.49            |
| 2                       | 700                             | 80   | 5      | 1.89            | 2.0                     | 80   | 2      | 900                             | 1.49            |
| 3                       | 500                             | 80   | 5      | 1.89            | 2.5                     | 80   | 2      | 900                             | 1.49            |
| 4                       | 500                             | 120  | 3      | 2.84            | 1.0                     | 100  | 2      | 900                             | 2.08            |
| 5                       | 900                             | 80   | 3      | 1.67            | 15                      | 100  | 2      | 900                             | 2.08            |
| 6                       | 500                             | 120  | 1      | 2.37            | 2.5                     | 100  | 2      | 900                             | 2.08            |
| 7                       |                                 | -    |        |                 | 1.0                     | 120  | 2      | 900                             | 2.67            |
| 8                       |                                 |      |        |                 | 1.5                     | 120  | 2      | 900                             | 2.67            |

|   |     |     |   |     |      |
|---|-----|-----|---|-----|------|
| 9 | 1.0 | 140 | 2 | 900 | 3.26 |
|---|-----|-----|---|-----|------|

The material composition analysis was used to determine the effect of fractionation conditions on chemical component of substrates. The yields of residual lignin, dissolved lignin and glucan were detected according to NREL method.

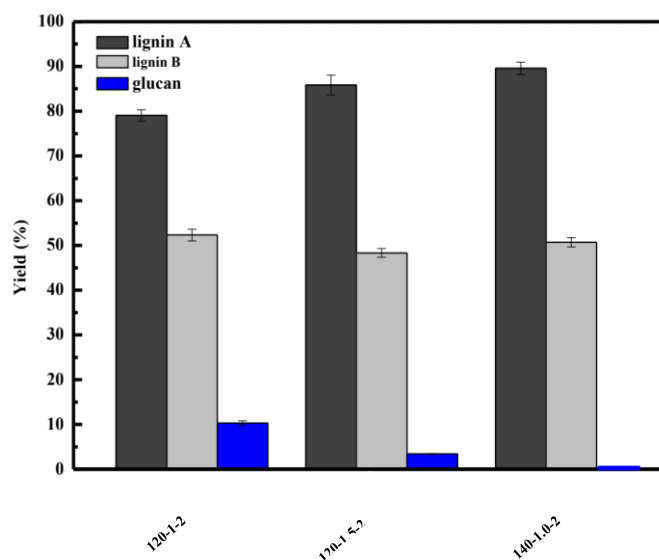

**Figure S1.** The effects of reaction temperature (120 °C and 140 °C) and phenol additions (1.0% and 1.5%, w/v) on lignin and glucan yield of moso bamboo. lignin A: residual lignin; lignin B: dissolved lignin (phenolated lignin included).

The GPC analysis was used to verify the effect of phenol addition on molecular weight of fractionated lignin. The GPC chromatogram of lignin I and lignin II were recorded on Angilent HPLC technique on a PLgel-Mixed-D column.

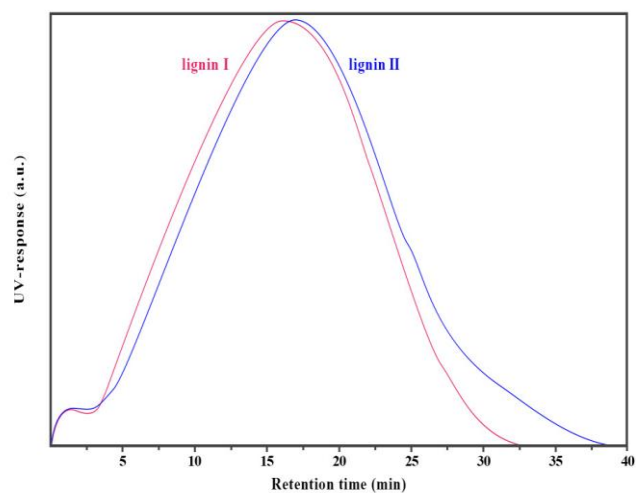

**Figure S2.** Molecular weight distributions for lignin fractions lignin I and lignin II.

The enzyme activity analysis was used to verify the effect of fractionation conditions on conversion of carbohydrate pulps to fermentable sugars. The  $\beta$ -glucosidase activity, the  $\text{exo-}\beta$ -1,4-glucanase activity were recorded on UV spectrophotometer.

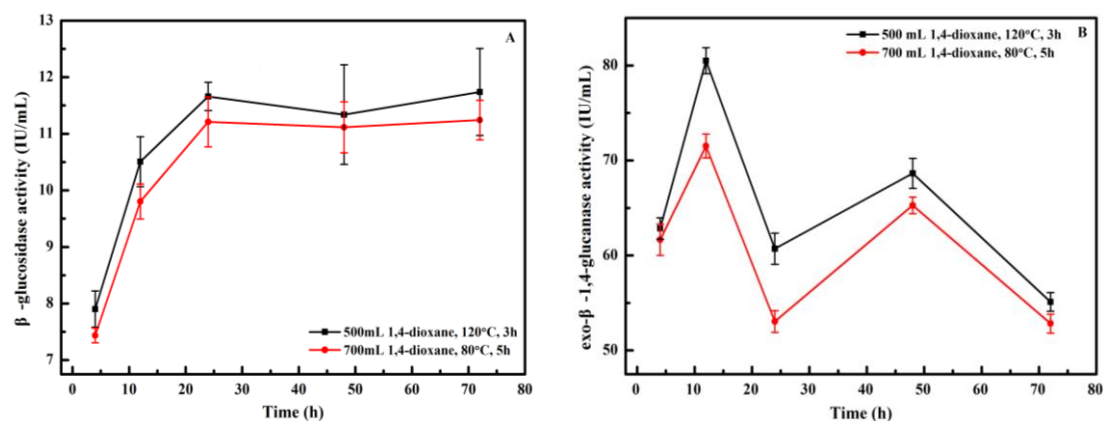

**Figure S3.** The effects of enzyme activities on moso bamboo hydrolysis. A: The  $\beta$ -glucosidase activity during the time period 0 to 72 h of enzymatic hydrolysis. B: The  $\text{exo-}\beta$ -1,4-glucanase activity during the time period 0 to 72 h.
